# Supplementary material for: Sedimentary evidence for a mid-Holocene iceberg-generated tsunami in a coastal lake, west Greenland
Source: Springer Nature journal article supplement (doi:10.1007/s41063-015-0007-7), 2015-11-20
Supplement: MOESM1 [file 41063_2015_7_MOESM1_ESM.docx]

Figure S1 Full diatom diagram from the IV4 sample core.
